# Supplementary material
Source: PubMed Central journal article supplement (PMC6938678)
Supplement: NIHMS1545387-supplement-Supplemental_Table_1.pdf [file NIHMS1545387-supplement-Supplemental_Table_1.pdf]

| <b>Table 1. Total number of female mice in each estrus phase per condition</b>                                                                                    |              |   |   |   |             |   |   |   |                    |   |   |   |
|-------------------------------------------------------------------------------------------------------------------------------------------------------------------|--------------|---|---|---|-------------|---|---|---|--------------------|---|---|---|
| <b>TBI Severity:</b>                                                                                                                                              | <b>Naive</b> |   |   |   | <b>Sham</b> |   |   |   | <b>Mod-CCI-TBI</b> |   |   |   |
| <b>Estrus Phase:</b>                                                                                                                                              | E            | P | M | D | E           | P | M | D | E                  | P | M | D |
| <b>Cocaine Dose:</b>                                                                                                                                              |              |   |   |   |             |   |   |   |                    |   |   |   |
| <b>Saline</b>                                                                                                                                                     | 2            | 1 | 1 | 2 | 2           | 2 | 0 | 2 | 2                  | 3 | 0 | 2 |
| <b>1.25 mg/kg</b>                                                                                                                                                 | 3            | 1 | 1 | 2 | 3           | 1 | 1 | 2 | 4                  | 0 | 3 | 0 |
| <b>2.5 mg/kg</b>                                                                                                                                                  | 4            | 2 | 3 | 3 | 3           | 3 | 2 | 2 | 3                  | 2 | 4 | 2 |
| <b>10 mg/kg</b>                                                                                                                                                   | 1            | 3 | 0 | 2 | 0           | 3 | 2 | 1 | 1                  | 2 | 2 | 3 |
| <b>30 mg/kg</b>                                                                                                                                                   | 0            | 3 | 4 | 4 | 0           | 3 | 1 | 3 | 1                  | 1 | 4 | 2 |
| Using vaginal cytology samples, adolescent female mice were categorized by estrus phase on the day of injury (E: Estrus; P: Proestrus; M: Metestrus; D: Diestrus) |              |   |   |   |             |   |   |   |                    |   |   |   |
