# Supplementary material
Source: PubMed Central journal article supplement (PMC6938678)
Supplement: NIHMS1545387-supplement-Supplemental_Table_2.pdf [file NIHMS1545387-supplement-Supplemental_Table_2.pdf]

| <b>Table 2. Total number of female mice grouped as High vs. Low hormone level</b>                                                                                              |              |     |             |     |                    |     |
|--------------------------------------------------------------------------------------------------------------------------------------------------------------------------------|--------------|-----|-------------|-----|--------------------|-----|
| <b>TBI Severity:</b>                                                                                                                                                           | <b>Naive</b> |     | <b>Sham</b> |     | <b>Mod-CCI-TBI</b> |     |
| Hormone Level:                                                                                                                                                                 | High         | Low | High        | Low | High               | Low |
| <b>Cocaine Dose:</b>                                                                                                                                                           |              |     |             |     |                    |     |
| <b>Saline</b>                                                                                                                                                                  | 3            | 3   | 4           | 2   | 5                  | 2   |
| <b>1.25 mg/kg</b>                                                                                                                                                              | 4            | 3   | 4           | 3   | 4                  | 3   |
| <b>2.5 mg/kg</b>                                                                                                                                                               | 6            | 6   | 6           | 4   | 5                  | 6   |
| <b>10 mg/kg</b>                                                                                                                                                                | 4            | 2   | 3           | 3   | 3                  | 5   |
| <b>30 mg/kg</b>                                                                                                                                                                | 3            | 8   | 3           | 4   | 2                  | 6   |
| Using vaginal cytology samples, adolescent female mice were categorized by relative hormone level on the day of injury (High: Estrus or Proestrus; Low: Metestrus or Diestrus) |              |     |             |     |                    |     |
